# Supplementary material for: Akkermansia muciniphila Colonization Alleviating High Fructose and Restraint Stress-Induced Jejunal Mucosal Barrier Disruption
Source: MDPI journal article supplement (doi:10.3390/nu14153164), 2022-07-30
Supplement: s1 [file s1]

**Supplementary Table S1: primers for real-time PCR**

| Gene name  | Forward                     | Reverse                   | source                         |
|------------|-----------------------------|---------------------------|--------------------------------|
| Cryptdins  | GGTGATCATCAGACCCCAGCATCAGT  | AAGAGACTAAAACCTGAGGAGCAGC | <a href="#">NM_001270613.1</a> |
| Defer1     | TCAAGAGGCTGCAAAGGAAGAGAAC   | TGGTCTCCATGTTTCAGCGACAGC  | <a href="#">NM_010031.2</a>    |
| Defer4     | CCAGGGGAAGATGACCAGGCTG      | TGCAGCGACGATTTCTACAAAGGC  | <a href="#">NM_183253.3</a>    |
| Defer2     | CCAGGCTGATCCTATCCAAA        | GTCCCATTCATGCGTTCTCT      | <a href="#">XM_021155240.1</a> |
| Defa6      | CCTTCCAGGTCCAGGCTGAT        | TGAGAAGTGGTCATCAGGCAC     | <a href="#">NM_001024225.2</a> |
| Lyz1       | GCCAAGGTCTACAATCGTTGTGAGTTG | CAGTCAGCCAGCTTGACACCACG   | <a href="#">NM_013590.4</a>    |
| Lyz2       | GGCTGGCTACTATGGAGTCAGCCTG   | GCATTCACAGCTCTTGGGGTTTTG  | <a href="#">NM_017372.3</a>    |
| Muc2       | ATGCCACCTCCTCAAAGAC         | GTAGTTTCCGTTGGAACAGTGAA   | <a href="#">NM_023566.4</a>    |
| Itln1      | TGACAATGGTCCAGCATTACC       | ACGGGGTTACCTTCTGGGA       | <a href="#">XM_029475723.1</a> |
| Retnlb     | AAGCCTACACTGTGTTTCCTTTT     | GCTTCCTTGATCCTTTGATCCAC   | <a href="#">XM_021185515.1</a> |
| Ang4       | GGTTGTGATTCCTCCAACCTCTG     | CTGAAGTTTTCTCCATAAGGGCT   | <a href="#">XM_021154346.1</a> |
| Tnf-a      | GCACAGAAAGCATGATCCGC        | CCCCATCTTTTGGGGGAGTG      | <a href="#">XM_021218154.1</a> |
| Il-6       | CACTTCACAAGTCGGAGGCT        | CTGCAAGTGCATCATCGTTGT     | <a href="#">XM_021163844.1</a> |
| Il-1b      | TCTTTGAAGTTGACGGACCC        | TGAGTGATACTGCCTGCCTG      | <a href="#">XM_006498795.5</a> |
| Mcp-1/Ccl2 | CAGGTCCCTGTCATGCTTCT        | TCTGGACCCATTCCCTTCTTG     | <a href="#">NM_011333.3</a>    |
| Il-10      | GCTCTTACTGACTGGCATGAG       | CGCAGCTCTAGGAGCATGTG      | <a href="#">XM_036162094.1</a> |
| Il-17a     | TGAGCTTCCCAGATCACAGA        | TCCAGAAGGCCCTCAGACTA      | <a href="#">XM_021176489.1</a> |

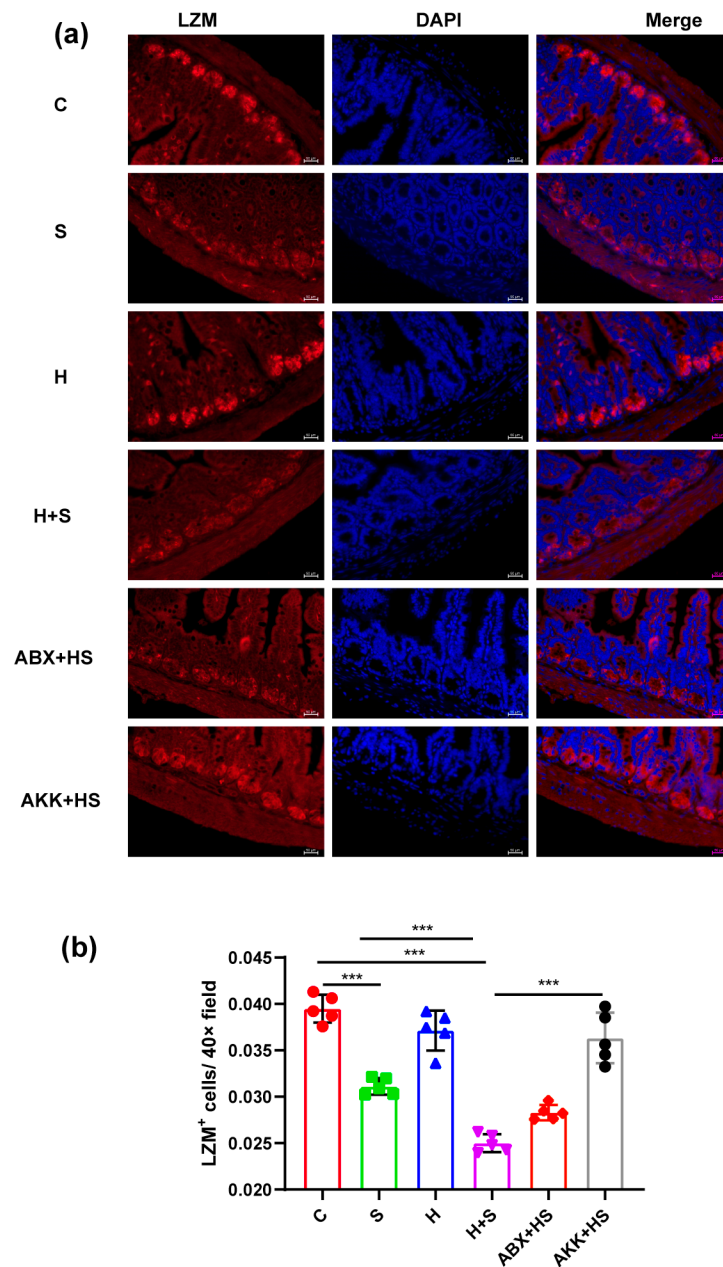

**Supplementary Figure S1. Changes of jejunal Paneth cells after *A. muciniphila* colonization in mice stimulated by high fructose and restraint stress**

a Immunofluorescence staining of jejunal Paneth cells (LZM, red) and nucleic acid (DAPI, blue) in the C, S, H, H+S, ABX+HS and AKK+HS groups. (n=5) Bar represents 50  $\mu$ m. b Quantification of the Paneth cells in jejunal crypts. Data are presented as the mean  $\pm$  SEM. \*\*\*P < 0.001 compared indicate significant difference. C: control group; S: restraint stress; H: high-fructose; H+S: high-fructose and restraint stress. ABX+HS: Antibiotic treatment + high fructose and restraint stress group; AKK+HS: *A. muciniphila* colonization + high fructose and restraint stress group.

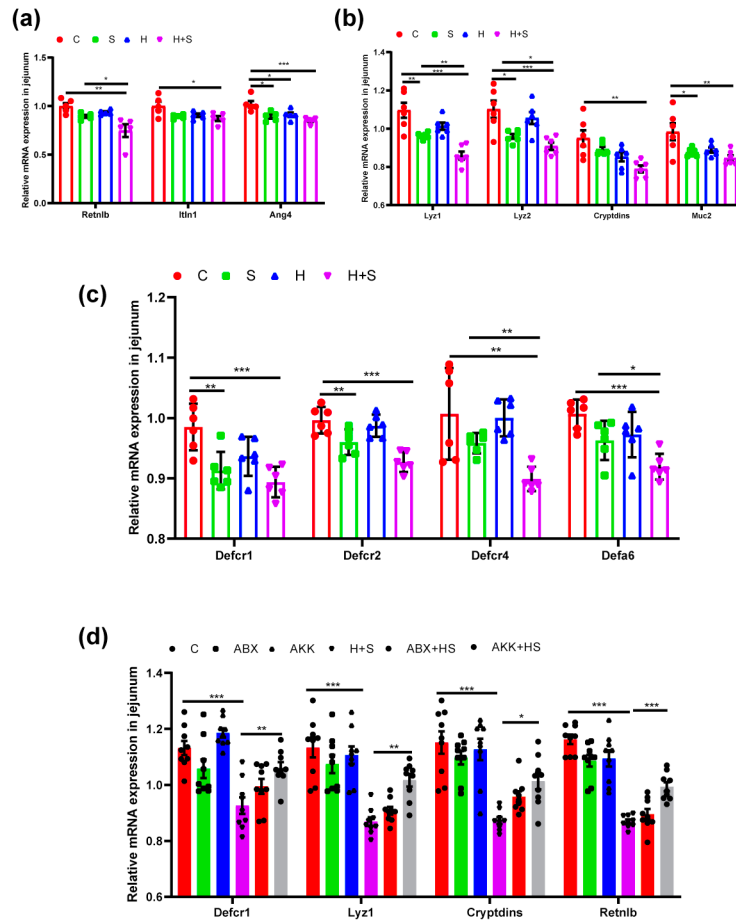

**Supplementary Figure S2. Effects of *A. muciniphila* colonization on the expression of jejunal antimicrobial peptides in high fructose and stress-stimulated mice**

a Changes in mRNA levels of Retnlb, Itln1, Ang4 in jejunum tissue (n=9). Changes in mRNA levels of Lyz1, Lyz2, Cryptdins, Muc2, Defcr1, Defcr2, Defcr4 and Defa6 in jejunum tissue (n=9) (b-c). d Changes of mRNA levels of antimicrobial peptides Defcr1, Lyz1, Cryptdins, Retnlb (n=9). Data are presented as the mean  $\pm$  SEM. \* $P < 0.05$ ; \*\* $P < 0.01$ ; \*\*\* $P < 0.001$  compared indicate significant difference. C: control group; S: restraint stress; H: high-fructose; H+S: high-fructose and restraint stress. ABX: Antibiotic treatment group; AKK: *A. muciniphila* colonization group; ABX+HS: Antibiotic treatment + high fructose and restraint stress group; AKK+HS: *A. muciniphila* colonization + high fructose and restraint stress group.
